# Supplementary material
Source: HighWire-hosted journal article supplement (https://bjgp.org/highwire/filestream/40099/field_highwire_adjunct_files/0/bjgp20X713465_suppl.pdf)
Supplement: bjgp20X713465_suppl.pdf [file bjgp20X713465_suppl.pdf]

**Supplementary Table S1.** Test results for each FIT brand separately for 3-sample FITs requested in primary care in symptomatic patients stratified for ages and related to diagnoses of CRC.

**Actim Fecal Blood:** Test results for 3-sample FITs requested in primary care in symptomatic patients, stratified for ages and related to diagnoses of CRC.

|                     | Age ≥18 years<br>n=4232 | Age ≥40 years<br>n=3337 | Age ≥50 years<br>n=2843 | Age ≥60 years<br>n=2287 | Age ≥70 years<br>n=1479 | Age ≥80 years<br>n=586 |
|---------------------|-------------------------|-------------------------|-------------------------|-------------------------|-------------------------|------------------------|
| Colorectal cancer n | 79                      | 78                      | 74                      | 65                      | 50                      | 24                     |
| True positive       | 77                      | 76                      | 72                      | 64                      | 49                      | 24                     |
| False negative      | 2                       | 2                       | 2                       | 1                       | 1                       | 0                      |
| False positive      | 1230                    | 1050                    | 944                     | 807                     | 557                     | 254                    |
| True negative       | 2923                    | 2209                    | 1825                    | 1415                    | 872                     | 308                    |
| Sensitivity %       | 97.5                    | 97.4                    | 97.3                    | 98.5                    | 98.0                    | 100                    |
| Specificity %       | 70.4                    | 67.8                    | 65.9                    | 63.7                    | 61.0                    | 54.8                   |
| PPV (95% CI)        | 5.9 (4.6-7.2)           | 6.7 (5.3-8.2)           | 7.1 (5.5-8.7)           | 7.3 (5.6-9.1)           | 8.1 (5.9-10.3)          | 8.6 (5.3-11.9)         |
| NPV (95% CI)        | 99.9 (99.8-100)         | 99.9 (99.8-100)         | 99.9 (99.7-100)         | 99.9 (99.8-100)         | 99.9 (99.7-100)         | 100 (98.8-100)         |
| LR+                 | 3.29                    | 3.02                    | 2.85                    | 2.71                    | 2.51                    | 2.21                   |
| LR-                 | 0.04                    | 0.04                    | 0.04                    | 0.02                    | 0.03                    | 0                      |

**Analyz FOB:** Test results for 3-sample FITs requested in primary care in symptomatic patients, stratified for ages and related to diagnoses of CRC.

|                     | Age ≥18 years<br>n=7889 | Age ≥40 years<br>n=6641 | Age ≥50 years<br>n=5748 | Age ≥60 years<br>n=4681 | Age ≥70 years<br>n=3048 | Age ≥80 years<br>n=1162 |
|---------------------|-------------------------|-------------------------|-------------------------|-------------------------|-------------------------|-------------------------|
| Colorectal cancer n | 158                     | 156                     | 149                     | 138                     | 99                      | 34                      |
| True positive       | 140                     | 139                     | 133                     | 122                     | 85                      | 29                      |
| False negative      | 18                      | 17                      | 16                      | 16                      | 14                      | 5                       |
| False positive      | 2090                    | 1835                    | 1650                    | 1398                    | 980                     | 389                     |
| True negative       | 5641                    | 4650                    | 3949                    | 3145                    | 1969                    | 739                     |
| Sensitivity %       | 88.6                    | 89.1                    | 89.3                    | 88.4                    | 85.9                    | 85.3                    |
| Specificity %       | 73.0                    | 71.7                    | 70.5                    | 69.2                    | 66.8                    | 65.5                    |
| PPV (95% CI)        | 6.3 (5.3-7.3)           | 7.0 (5.9-8.2)           | 7.5 (6.2-8.7)           | 8.0 (6.7-9.4)           | 8.0 (6.4-9.6)           | 6.9 (4.5-9.4)           |
| NPV (95% CI)        | 99.7 (99.5-99.8)        | 99.6 (99.5-99.8)        | 99.6 (99.4-99.8)        | 99.5 (99.2-99.7)        | 99.3 (98.9-99.7)        | 99.3 (98.7-99.9)        |
| LR+                 | 3.28                    | 3.15                    | 3.03                    | 2.87                    | 2.58                    | 2.47                    |
| LR-                 | 0.16                    | 0.15                    | 0.15                    | 0.17                    | 0.21                    | 0.22                    |

**Chemtrue FOB Test:** Test results for 3-sample FITs requested in primary care in symptomatic patients, stratified for ages and related to diagnoses of CRC.

|                     | Age ≥18 years<br>n=1756 | Age ≥40 years<br>n=1503 | Age ≥50 years<br>n=1345 | Age ≥60 years<br>n=1140 | Age ≥70 years<br>n=745 | Age ≥80 years<br>n=268 |
|---------------------|-------------------------|-------------------------|-------------------------|-------------------------|------------------------|------------------------|
| Colorectal cancer n | 29                      | 29                      | 29                      | 26                      | 19                     | 6                      |
| True positive       | 29                      | 29                      | 29                      | 26                      | 19                     | 6                      |
| False negative      | 0                       | 0                       | 0                       | 0                       | 0                      | 0                      |
| False positive      | 593                     | 523                     | 483                     | 431                     | 302                    | 132                    |
| True negative       | 1134                    | 951                     | 833                     | 683                     | 424                    | 130                    |
| Sensitivity %       | 100                     | 100                     | 100                     | 100                     | 100                    | 100                    |
| Specificity %       | 65.7                    | 64.5                    | 63.3                    | 61.3                    | 58.4                   | 49.6                   |
| PPV (95% CI)        | 4.7 (3.0-6.3)           | 5.3 (3.4-7.1)           | 5.7 (3.7-7.7)           | 5.7 (3.6-7.8)           | 5.9 (3.3-8.5)          | 4.3 (0.9-7.8)          |
| NPV (95% CI)        | 100 (99.7-100)          | 100 (99.6-100)          | 100 (99.6-100)          | 100 (99.5-100)          | 100 (99.1-100)         | 100 (97.2-100)         |
| LR+                 | 2.92                    | 2.82                    | 2.72                    | 2.58                    | 2.40                   | 1.98                   |
| LR-                 | 0                       | 0                       | 0                       | 0                       | 0                      | 0                      |

**Diaquick FOB:** Test results for 3-sample FITs requested in primary care in symptomatic patients, stratified for ages and related to diagnoses of CRC.

|                     | Age ≥18 years<br>n=1751 | Age ≥40 years<br>n=1524 | Age ≥50 years<br>n=1339 | Age ≥60 years<br>n=1085 | Age ≥70 years<br>n=720 | Age ≥80 years<br>n=302 |
|---------------------|-------------------------|-------------------------|-------------------------|-------------------------|------------------------|------------------------|
| Colorectal cancer n | 38                      | 38                      | 38                      | 34                      | 28                     | 14                     |
| True positive       | 31                      | 31                      | 31                      | 28                      | 23                     | 11                     |
| False negative      | 7                       | 7                       | 7                       | 6                       | 5                      | 3                      |
| False positive      | 352                     | 315                     | 294                     | 244                     | 169                    | 82                     |
| True negative       | 1361                    | 1171                    | 1007                    | 807                     | 523                    | 206                    |
| Sensitivity %       | 81.6                    | 81.6                    | 81.6                    | 82.4                    | 82.1                   | 78.6                   |
| Specificity %       | 79.5                    | 78.8                    | 77.4                    | 76.8                    | 75.6                   | 71.5                   |
| PPV (95% CI)        | 8.1 (5.4-10.8)          | 9.0 (6.0-12.0)          | 9.5 (6.3-12.7)          | 10.3 (6.7-13.9)         | 12.0 (7.4-16.6)        | 11.8 (5.3-18.4)        |
| NPV (95% CI)        | 99.5 (99.1-99.9)        | 99.4 (99.0-99.8)        | 99.3 (98.8-99.8)        | 99.3 (98.7-99.9)        | 99.1 (98.2-99.9)       | 98.6 (97.0-100)        |
| LR+                 | 3.98                    | 3.85                    | 3.61                    | 3.55                    | 3.36                   | 2.76                   |
| LR-                 | 0.23                    | 0.23                    | 0.24                    | 0.23                    | 0.24                   | 0.30                   |

CI: confidence interval. CRC: colorectal cancer. FIT: faecal immunochemical test as described in the Material and Methods section. LR+: positive likelihood ratio. LR-: negative likelihood ratio. NPV: negative predictive value. PPV: positive predictive value.

**Supplementary Table S2. FIT brand Actim Fecal Blood:** Test results for combinations of 3-sample FITs, haemoglobin values and platelet counts in symptomatic patients in primary care related to diagnoses of CRC.

|                     | FIT (Actim Fecal Blood) and haemoglobin value (n=3866) |                  |                          |                             | FIT (Actim Fecal Blood), haemoglobin value and platelet count (n=1956) |                  |                         |                            |                                           |
|---------------------|--------------------------------------------------------|------------------|--------------------------|-----------------------------|------------------------------------------------------------------------|------------------|-------------------------|----------------------------|-------------------------------------------|
|                     | FIT positive                                           | Anaemia          | Anaemia and FIT positive | Anaemia and/or FIT positive | FIT positive                                                           | Thromb           | Thromb and FIT positive | Thromb and/or FIT positive | Thromb and/or anaemia and/or FIT positive |
| Colorectal cancer n | 75                                                     | 75               | 75                       | 75                          | 42                                                                     | 42               | 42                      | 42                         | 42                                        |
| True positive       | 73                                                     | 39               | 39                       | 73                          | 42                                                                     | 6                | 6                       | 42                         | 42                                        |
| False negative      | 2                                                      | 36               | 36                       | 2                           | 0                                                                      | 36               | 36                      | 0                          | 0                                         |
| False positive      | 1146                                                   | 1074             | 454                      | 1766                        | 670                                                                    | 151              | 73                      | 748                        | 1122                                      |
| True negative       | 2645                                                   | 2717             | 3337                     | 2025                        | 1244                                                                   | 1763             | 1841                    | 1166                       | 792                                       |
| Sensitivity %       | 97.3                                                   | 52.0             | 52.0                     | 97.3                        | 100                                                                    | 14.3             | 14.3                    | 100                        | 100                                       |
| Specificity %       | 69.8                                                   | 71.7             | 88.0                     | 53.4                        | 65.0                                                                   | 92.1             | 96.2                    | 60.9                       | 41.4                                      |
| PPV (95% CI)        | 6.0 (4.7-7.3)                                          | 3.5 (2.4-4.6)    | 7.9 (5.5-10.3)           | 4.0 (3.1-4.9)               | 5.9 (4.2-7.6)                                                          | 3.8 (0.8-6.8)    | 7.6 (1.8-13.4)          | 5.3 (3.8-6.9)              | 3.6 (2.5-4.7)                             |
| NPV (95% CI)        | 99.9 (99.8-100)                                        | 98.7 (98.3-99.1) | 98.9 (98.6-99.3)         | 99.9 (99.8-100)             | 100 (99.7-100)                                                         | 98.0 (97.4-98.6) | 98.1 (97.5-98.7)        | 100 (99.7-100)             | 100 (99.5-100)                            |
| LR+                 | 3.22                                                   | 1.84             | 4.33                     | 2.09                        | 2.86                                                                   | 1.81             | 3.76                    | 3.32                       | 1.71                                      |
| LR-                 | 0.04                                                   | 0.67             | 0.55                     | 0.05                        | N/A                                                                    | 1.07             | 0.89                    | N/A                        | N/A                                       |

CI: confidence interval. CRC: colorectal cancer. FIT: faecal immunochemical test, as described in the Material and Methods section. LR+: positive likelihood ratio. LR-: negative likelihood ratio. N/A: not applicable. NPV: negative predictive value. PPV: positive predictive value. Thromb: thrombocytosis.

Anaemia: haemoglobin value <117 g/l in women, <134 g/l in men. Thrombocytosis: >390x10<sup>9</sup>/l in women and >350x10<sup>9</sup>/l in men.

**Supplementary Table S3. FIT brand Analyz FOB:** Test results for combinations of 3-sample FITs, haemoglobin values and platelet counts in symptomatic patients in primary care related to diagnoses of CRC.

|                     | FIT (Analyze FOB) and haemoglobin value (n=6783) |                  |                          |                             | FIT (Analyze FOB), haemoglobin value and platelet count (n=6124) |                  |                         |                            |                                           |
|---------------------|--------------------------------------------------|------------------|--------------------------|-----------------------------|------------------------------------------------------------------|------------------|-------------------------|----------------------------|-------------------------------------------|
|                     | FIT positive                                     | Anaemia          | Anaemia and FIT positive | Anaemia and/or FIT positive | FIT positive                                                     | Thromb           | Thromb and FIT positive | Thromb and/or FIT positive | Thromb and/or anaemia and/or FIT positive |
| Colorectal cancer n | 149                                              | 149              | 149                      | 149                         | 133                                                              | 133              | 133                     | 133                        | 133                                       |
| True positive       | 131                                              | 63               | 57                       | 137                         | 115                                                              | 24               | 23                      | 116                        | 122                                       |
| False negative      | 18                                               | 86               | 92                       | 12                          | 18                                                               | 109              | 110                     | 17                         | 11                                        |
| False positive      | 1842                                             | 1782             | 609                      | 3015                        | 1680                                                             | 473              | 191                     | 1962                       | 2910                                      |
| True negative       | 4792                                             | 4852             | 6025                     | 3619                        | 4311                                                             | 5518             | 5800                    | 4029                       | 3081                                      |
| Sensitivity %       | 87.9                                             | 42.3             | 38.3                     | 91.9                        | 86.5                                                             | 18.0             | 17.3                    | 87.2                       | 91.7                                      |
| Specificity %       | 72.2                                             | 73.1             | 90.8                     | 54.6                        | 72.0                                                             | 92.1             | 96.8                    | 67.3                       | 51.4                                      |
| PPV (95% CI)        | 6.6 (5.5-7.7)                                    | 3.4 (2.6-4.2)    | 8.6 (6.4-10.7)           | 4.3 (3.6-5.1)               | 6.4 (5.3-7.5)                                                    | 4.8 (2.9-6.7)    | 10.7 (6.6-14.9)         | 5.6 (4.6-6.6)              | 4.0 (3.3-4.7)                             |
| NPV (95% CI)        | 99.6 (99.5-99.8)                                 | 98.3 (97.9-98.6) | 98.5 (98.2-98.8)         | 99.7 (99.5-99.9)            | 99.6 (99.4-99.8)                                                 | 98.1 (97.7-98.4) | 98.1 (97.8-98.5)        | 99.6 (99.4-99.8)           | 99.6 (99.4-99.9)                          |
| LR+                 | 3.16                                             | 1.57             | 4.16                     | 2.02                        | 3.09                                                             | 2.28             | 5.41                    | 2.38                       | 1.89                                      |
| LR-                 | 0.17                                             | 0.79             | 0.68                     | 0.15                        | 0.19                                                             | 0.89             | 0.85                    | 0.19                       | 0.16                                      |

CI: confidence interval. CRC: colorectal cancer. FIT: faecal immunochemical test, as described in the Material and Methods section. LR+: positive likelihood ratio. LR-: negative likelihood ratio. NPV: negative predictive value. PPV: positive predictive value. Thromb: thrombocytosis.

Anaemia: haemoglobin value <117 g/l in women, <134 g/l in men. Thrombocytosis: >387x10<sup>9</sup>/l in women and >348x10<sup>9</sup>/l in men.

**Supplementary Table S4. FIT brand Chemtrue FOB Test:** Test results for combinations of 3-sample FITs, haemoglobin values and platelet counts in symptomatic patients in primary care related to diagnoses of CRC.

|                     | FIT (Chemtrue FOB Test) and haemoglobin value (n=1550) |                  |                          |                             | FIT (Chemtrue FOB Test), haemoglobin value and platelet count (n=1445) |                  |                         |                            |                                           |
|---------------------|--------------------------------------------------------|------------------|--------------------------|-----------------------------|------------------------------------------------------------------------|------------------|-------------------------|----------------------------|-------------------------------------------|
|                     | FIT positive                                           | Anaemia          | Anaemia and FIT positive | Anaemia and/or FIT positive | FIT positive                                                           | Thromb           | Thromb and FIT positive | Thromb and/or FIT positive | Thromb and/or anaemia and/or FIT positive |
| Colorectal cancer n | 29                                                     | 29               | 29                       | 29                          | 29                                                                     | 29               | 29                      | 29                         | 29                                        |
| True positive       | 29                                                     | 16               | 16                       | 29                          | 29                                                                     | 6                | 6                       | 29                         | 29                                        |
| False negative      | 0                                                      | 13               | 13                       | 0                           | 0                                                                      | 23               | 23                      | 0                          | 0                                         |
| False positive      | 529                                                    | 379              | 164                      | 744                         | 484                                                                    | 154              | 63                      | 575                        | 742                                       |
| True negative       | 992                                                    | 1142             | 1357                     | 777                         | 932                                                                    | 1262             | 1353                    | 841                        | 674                                       |
| Sensitivity %       | 100                                                    | 55.2             | 55.2                     | 100                         | 100                                                                    | 20.7             | 20.7                    | 100                        | 100                                       |
| Specificity %       | 65.2                                                   | 75.1             | 89.2                     | 51.1                        | 65.8                                                                   | 89.1             | 95.6                    | 59.4                       | 47.6                                      |
| PPV (95% CI)        | 5.2 (3.5-7.4)                                          | 4.1 (2.1-6.0)    | 8.9 (4.7-13.0)           | 3.8 (2.4-5.1)               | 5.7 (3.7-7.7)                                                          | 3.8 (0.8-6.7)    | 8.7 (2.0-15.3)          | 4.8 (3.1-6.5)              | 3.8 (2.4-5.1)                             |
| NPV (95% CI)        | 100 (99.6-100)                                         | 98.9 (98.3-99.5) | 99.1 (98.5-99.6)         | 100 (99.5-100)              | 100 (99.6-100)                                                         | 98.2 (97.5-98.9) | 98.3 (97.7-99.0)        | 100 (99.6-100)             | 100 (99.5-100)                            |
| LR+                 | 2.88                                                   | 2.21             | 5.12                     | 2.04                        | 2.93                                                                   | 1.90             | 4.65                    | 2.46                       | 1.91                                      |
| LR-                 | 0                                                      | 0.60             | 0.50                     | 0                           | 0                                                                      | 0.89             | 0.83                    | 0                          | 0                                         |

CI: confidence interval. CRC: colorectal cancer. FIT: faecal immunochemical test, as described in the Material and Methods section. LR+: positive likelihood ratio. LR-: negative likelihood ratio. NPV: negative predictive value. PPV: positive predictive value. Thromb: thrombocytosis.

Anaemia: haemoglobin value <117 g/l in women, <134 g/l in men. Thrombocytosis: >387x10<sup>9</sup>/l in women and >348x10<sup>9</sup>/l in men.

**Supplementary Table S5. FIT brand Diaquick FOB:** Test results for combinations of 3-sample FITs, haemoglobin values and platelet counts in symptomatic patients in primary care related to diagnoses of CRC.

|                     | FIT (Diaquick FOB) and haemoglobin value (n=1528) |                  |                          |                             | FIT (Diaquick FOB), haemoglobin value and platelet count (n=1326) |                  |                         |                            |                                           |
|---------------------|---------------------------------------------------|------------------|--------------------------|-----------------------------|-------------------------------------------------------------------|------------------|-------------------------|----------------------------|-------------------------------------------|
|                     | FIT positive                                      | Anaemia          | Anaemia and FIT positive | Anaemia and/or FIT positive | FIT positive                                                      | Thromb           | Thromb and FIT positive | Thromb and/or FIT positive | Thromb and/or anaemia and/or FIT positive |
| Colorectal cancer n | 36                                                | 36               | 36                       | 36                          | 33                                                                | 33               | 33                      | 33                         | 33                                        |
| True positive       | 29                                                | 14               | 11                       | 32                          | 26                                                                | 4                | 4                       | 26                         | 29                                        |
| False negative      | 7                                                 | 22               | 25                       | 4                           | 7                                                                 | 29               | 29                      | 7                          | 4                                         |
| False positive      | 313                                               | 420              | 122                      | 611                         | 277                                                               | 92               | 25                      | 344                        | 575                                       |
| True negative       | 1179                                              | 1072             | 1370                     | 881                         | 1016                                                              | 1201             | 1268                    | 949                        | 718                                       |
| Sensitivity %       | 80.6                                              | 38.9             | 30.6                     | 88.9                        | 78.8                                                              | 12.1             | 12.1                    | 78.8                       | 87.9                                      |
| Specificity %       | 79.0                                              | 71.8             | 91.8                     | 59.0                        | 78.6                                                              | 92.9             | 98.1                    | 73.4                       | 55.5                                      |
| PPV (95% CI)        | 8.5 (5.8-12.0)                                    | 3.2 (1.8-5.4)    | 8.3 (4.2-14.3)           | 5.0 (3.4-7.0)               | 8.6 (5.7-12.3)                                                    | 4.2 (1.1-10.3)   | 13.8 (3.9-31.7)         | 7.0 (4.6-10.1)             | 4.8 (3.2-6.8)                             |
| NPV (95% CI)        | 99.4 (98.8-99.8)                                  | 98.0 (97.0-98.7) | 98.2 (97.4-98.8)         | 99.5 (98.8-99.9)            | 99.3 (98.6-99.7)                                                  | 97.6 (96.6-98.4) | 97.8 (96.8-98.5)        | 99.3 (98.5-99.7)           | 99.4 (98.6-99.8)                          |
| LR+                 | 3.84                                              | 1.38             | 3.74                     | 2.20                        | 3.68                                                              | 1.70             | 6.27                    | 2.96                       | 1.98                                      |
| LR-                 | 0.25                                              | 0.85             | 0.76                     | 0.17                        | 0.27                                                              | 0.95             | 0.90                    | 0.29                       | 0.22                                      |

CI: confidence interval. CRC: colorectal cancer. FIT: faecal immunochemical test, as described in the Material and Methods section. LR+: positive likelihood ratio. LR-: negative likelihood ratio. NPV: negative predictive value. PPV: positive predictive value. Thromb: thrombocytosis.

Anaemia: haemoglobin value <117 g/l in women, <134 g/l in men. Thrombocytosis: >387x10<sup>9</sup>/l in women and >348x10<sup>9</sup>/l in men.
